# Supplementary material
Source: Springer Nature journal article supplement (https://www.springermedizin.de/resource/supplementary/12913_2011_1856_MOESM3_ESM.pdf/9529084)

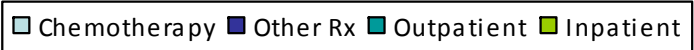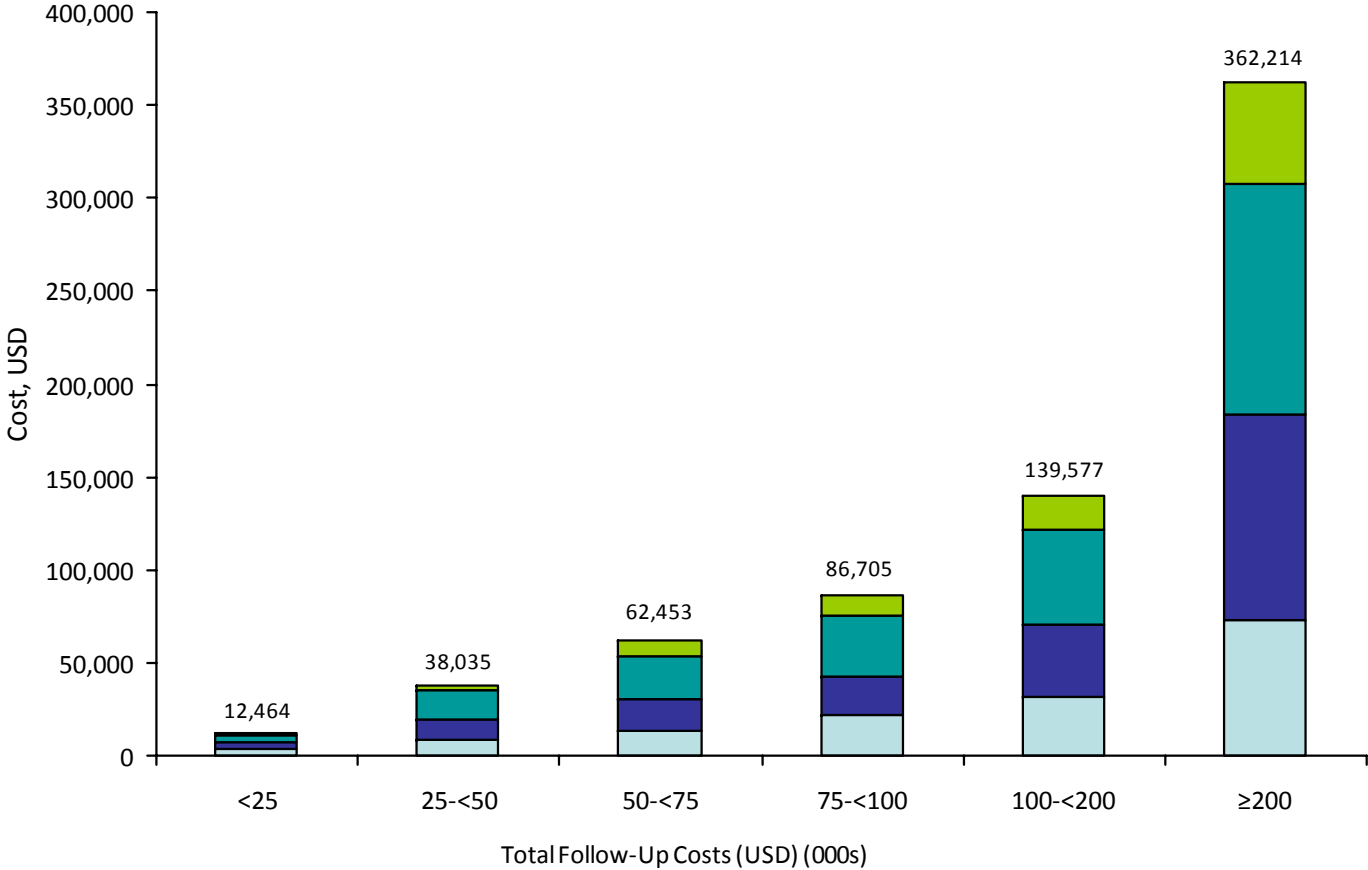

Patients

114

111

98

97

212

144

Supplement: MOESM3 [file 9529084]
